# Supplementary material for: Phagocytic glia are obligatory intermediates in transmission of mutant huntingtin aggregates across neuronal synapses
Source: eLife journal article supplement (doi:10.7554/elife.58499), 2020-05-28
Supplement: supp [file elife-58499-supp-v1.zip]

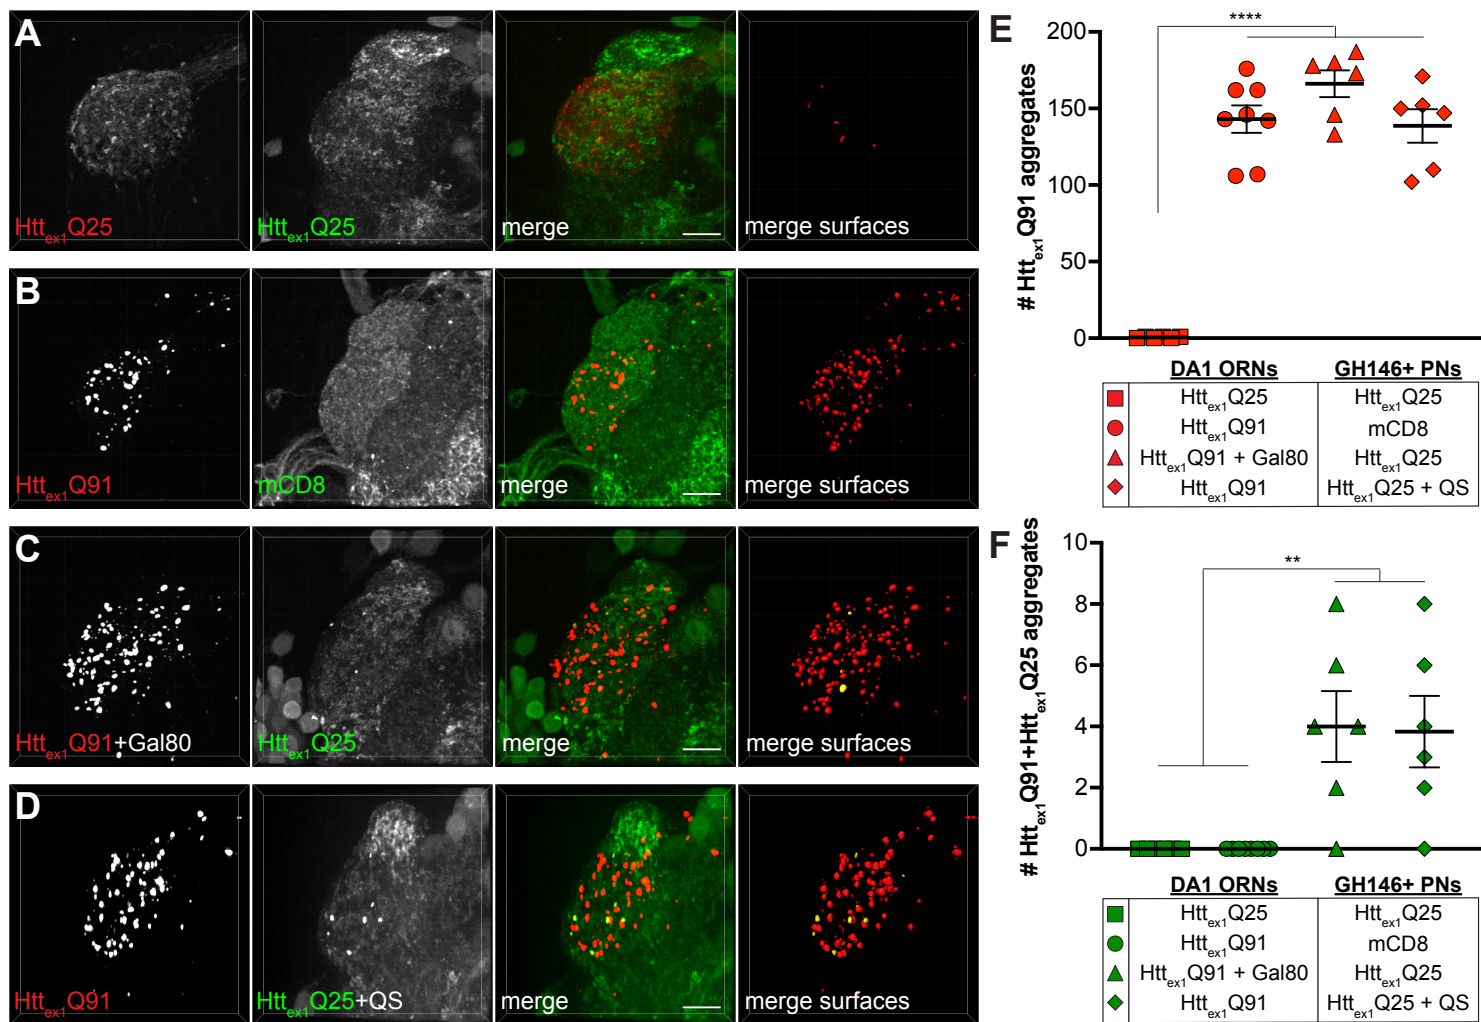

**Figure 1 – figure supplement 3. Controls for prion-like transmission of mHtt<sub>ex1</sub> aggregates from presynaptic DA1 ORNs to postsynaptic PNs.** (A-D) Confocal z-stacks of DA1 glomeruli from 10 day-old adults expressing (A) Htt<sub>ex1</sub>Q25-mCherry in DA1 ORNs and Htt<sub>ex1</sub>Q25-GFP in GH146+ PNs, (B) Htt<sub>ex1</sub>Q91-mCherry in DA1 ORNs and mCD8-GFP in GH146+ PNs, (C) Htt<sub>ex1</sub>Q91-mCherry together with Gal80 in DA1 ORNs and Htt<sub>ex1</sub>Q25-GFP in GH146+ PNs, and (D) Htt<sub>ex1</sub>Q91-mCherry in DA1 ORNs and Htt<sub>ex1</sub>Q25-GFP together with QS in GH146+ PNs. mCherry+ surfaces identified by semi-automated image segmentation are shown in the last panels, with Htt<sub>ex1</sub>Q91-only surfaces in red and Htt<sub>ex1</sub>Q91+Htt<sub>ex1</sub>Q25 surfaces in yellow. Scale bars = 10 μm. (E and F) Quantification of (E) Htt<sub>ex1</sub>Q91 and (F) Htt<sub>ex1</sub>Q91+Htt<sub>ex1</sub>Q25 aggregates in the DA1 glomeruli of flies with genotypes shown in (A-D). Data are shown as mean ± SEM. \*\*p < 0.01, \*\*\*\*p < 0.0001 by one-way ANOVA with Tukey's multiple comparisons test.
