# Supplementary material for: Phagocytic glia are obligatory intermediates in transmission of mutant huntingtin aggregates across neuronal synapses
Source: eLife journal article supplement (doi:10.7554/elife.58499), 2020-05-28
Supplement: supp [file elife-58499-supp-v1.zip]

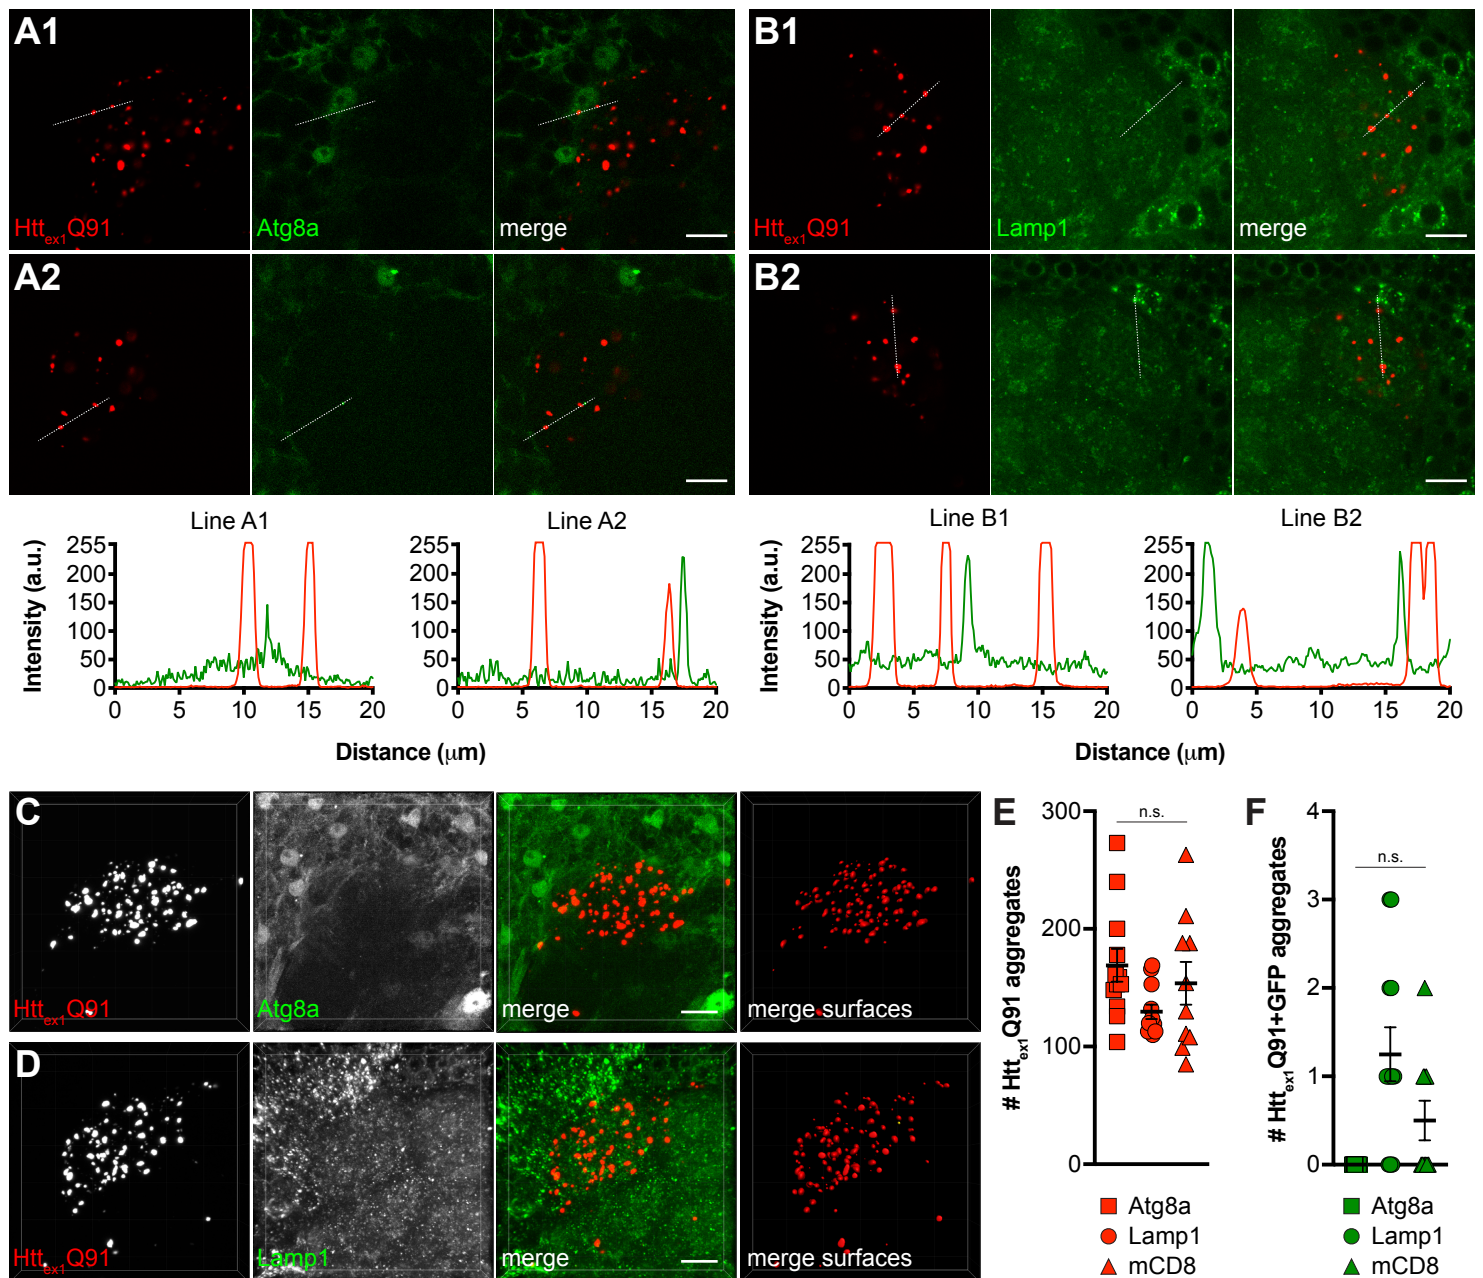

**Figure 5 – figure supplement 3. mHtt<sub>ex1</sub> aggregates generated in ORNs do not co-localize with markers of lysosomes or autophagosomes in glia.** (A1-2 and B1-2) Single confocal slices from DA1 glomeruli of 4-5 day-old adult males expressing Htt<sub>ex1</sub>Q91-mCherry in DA1 ORNs and either the autophagosomal marker Atg8a-GFP (A1 and A2) or the lysosomal marker GFP-Lamp1 (B1 and B2) in repo+ glia. Scale bars = 10 μm. Htt<sub>ex1</sub>Q91-mCherry (red) and Atg8a- or Lamp1-GFP (green) fluorescence intensity profiles for lines indicated in (A1-2 and B1-2) are shown below images; a.u. = arbitrary units. Lines were scanned from leftmost to rightmost point. (C and D) Confocal z-stacks of DA1 glomeruli from 4-5 day-old adult males expressing Htt<sub>ex1</sub>Q91-mCherry in DA1 ORNs and either Atg8a-GFP (C) or GFP-Lamp1 (D) in repo+ glia. mCherry+ surfaces identified by semi-automated image segmentation are shown in the last panels, with Htt<sub>ex1</sub>Q91-only surfaces in red and Htt<sub>ex1</sub>Q91+GFP surfaces in yellow. Scale bars = 10 μm. (E and F) Quantification of Htt<sub>ex1</sub>Q91 (E) and Htt<sub>ex1</sub>Q91+GFP (F) surfaces for the same genotypes as in (C and D) and for control animals expressing mCD8-GFP in glia. Data are shown as mean ± SEM; n.s. = not significant by one-way ANOVA with Tukey's multiple comparisons test.
