# Supplementary material for: Phagocytic glia are obligatory intermediates in transmission of mutant huntingtin aggregates across neuronal synapses
Source: eLife journal article supplement (doi:10.7554/elife.58499), 2020-05-28
Supplement: supp [file elife-58499-supp-v1.zip]

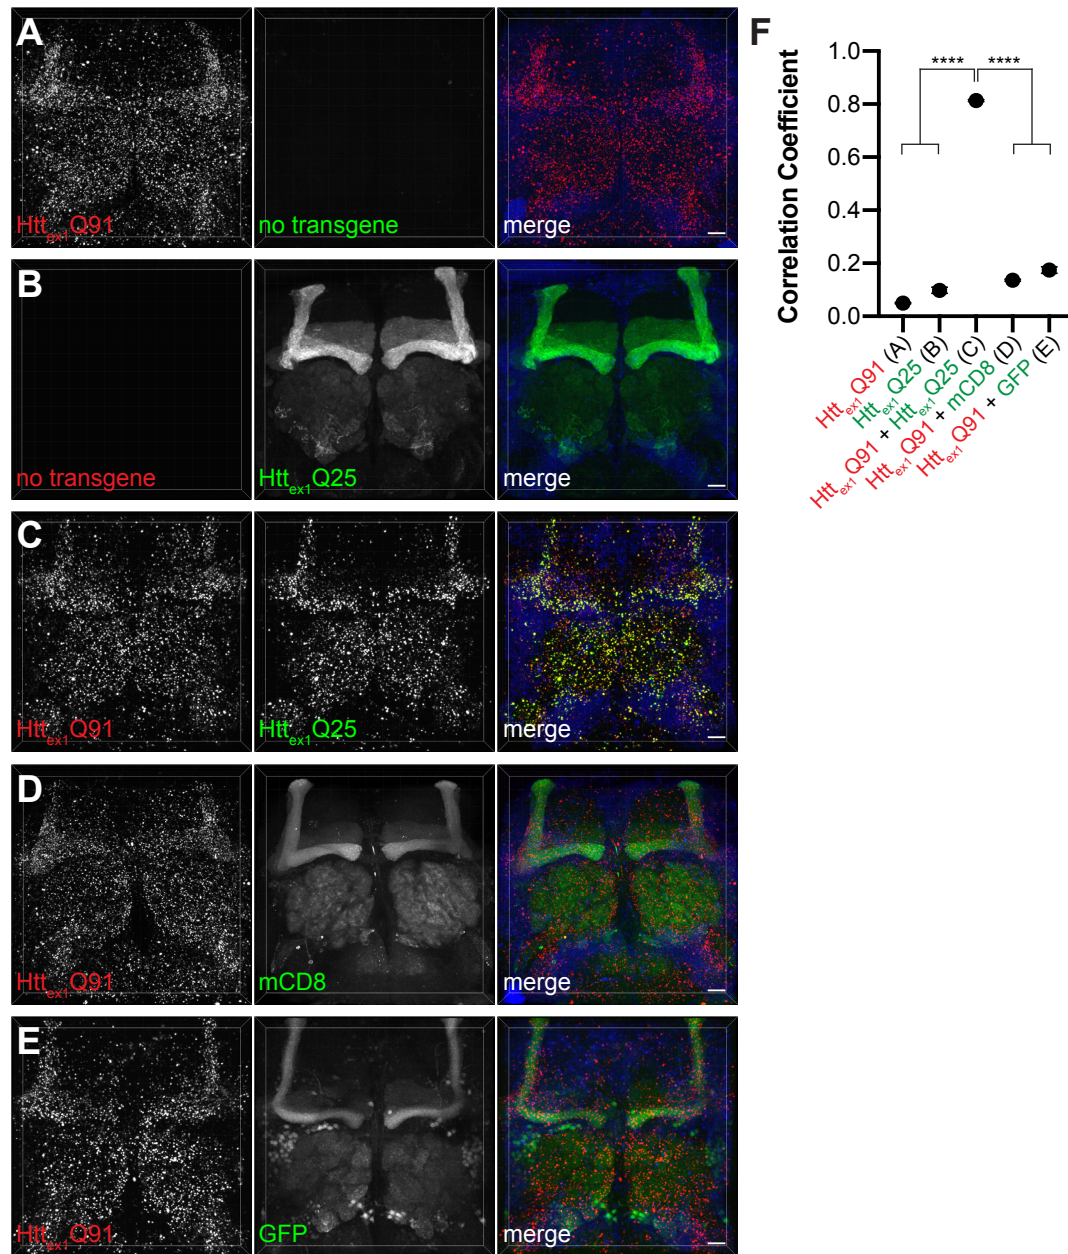

**Figure 1 – figure supplement 1. mHtt<sub>ex1</sub> nucleates prion-like conversion of wtHtt<sub>ex1</sub> in fly neurons.** (A-E) Confocal z-stacks of 14 day-old adult female brains expressing (A) Htt<sub>ex1</sub> Q91-mCherry or (B) Htt<sub>ex1</sub> Q25-GFP alone, or co-expressing Htt<sub>ex1</sub> Q91-mCherry with (C) Htt<sub>ex1</sub> Q25-GFP, (D) membrane-targeted mCD8-GFP, or (E) soluble GFP in all neurons using *elav[C155]-Gal4*. Dimensions of each confocal stack are 250 x 250 x ~60 (xyz) μm. Merged images include DAPI signal (*blue*) to label nuclei. Scale bars = 20 μm. (F) Co-localization of mCherry and GFP fluorescent signals calculated as Pearson's correlation coefficients for genotypes shown in (A-E). Data are shown as mean ± SEM; \*\*\*\*p < 0.0001 by one-way ANOVA with Tukey's multiple comparisons test.
