# Supplementary material for: Phagocytic glia are obligatory intermediates in transmission of mutant huntingtin aggregates across neuronal synapses
Source: eLife journal article supplement (doi:10.7554/elife.58499), 2020-05-28
Supplement: supp [file elife-58499-supp-v1.zip]

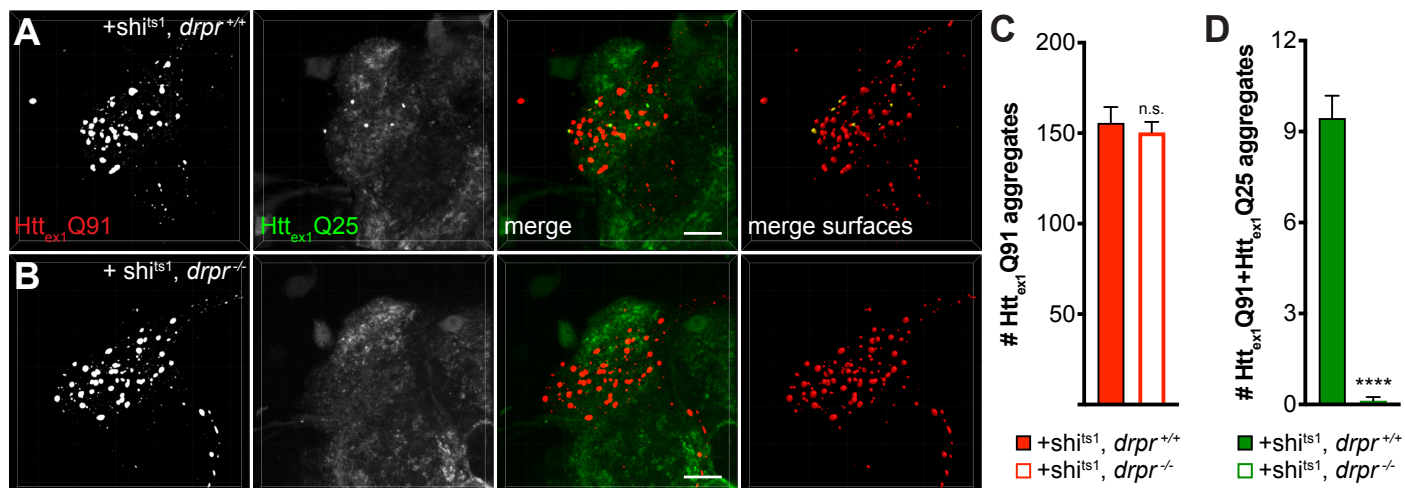

**Figure 5 – figure supplement 1. Draper is required for enhanced transfer of mHtt<sub>ex1</sub> from *shi*<sup>ts1</sup>-expressing DA1 ORNs to GH146+ PNs.** (A and B) Confocal z-stacks of DA1 glomeruli from 7 day-old *drpr*<sup>+/+</sup> (A) or *drpr*<sup>-/-</sup> (B) adult females co-expressing Htt<sub>ex1</sub> Q91-mCherry with *shi*<sup>ts1</sup> in DA1 ORNs and Htt<sub>ex1</sub> Q25-GFP in GH146+ PNs. Adult flies were shifted from 18°C to 31°C upon eclosion. mCherry+ surfaces identified by semi-automated image segmentation are shown in the last panels, with Htt<sub>ex1</sub> Q91-only surfaces in red and Htt<sub>ex1</sub> Q91+Htt<sub>ex1</sub> Q25 surfaces in yellow. Scale bars = 10 μm. (C and D) Quantification of Htt<sub>ex1</sub> Q91 (C) and Htt<sub>ex1</sub> Q91+Htt<sub>ex1</sub> Q25 (D) aggregates for the same genotypes shown in (A and B). Data are shown as mean ± SEM; \*\*\*\*p < 0.0001 or n.s. = not significant by Student's *t*-test comparing *drpr*<sup>+/+</sup> vs *drpr*<sup>-/-</sup> flies.
