# Supplementary material for: Phagocytic glia are obligatory intermediates in transmission of mutant huntingtin aggregates across neuronal synapses
Source: eLife journal article supplement (doi:10.7554/elife.58499), 2020-05-28
Supplement: supp [file elife-58499-supp-v1.zip]

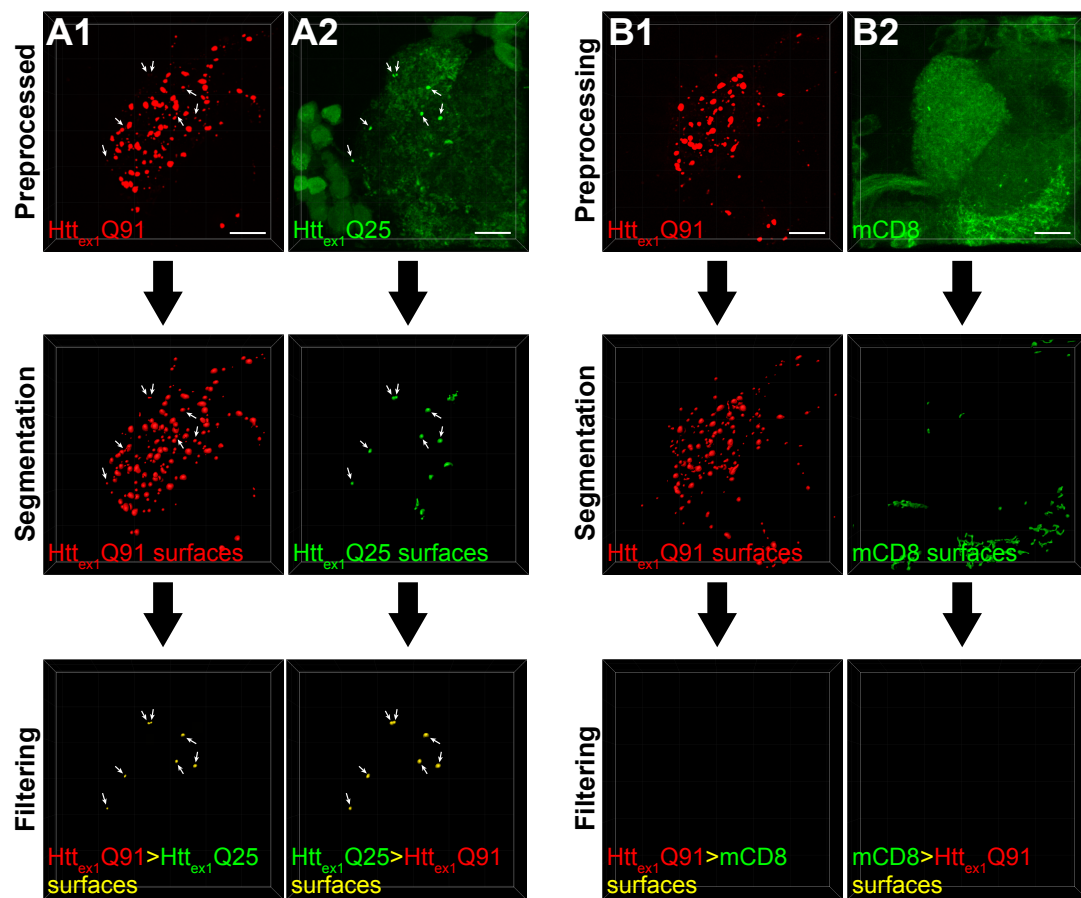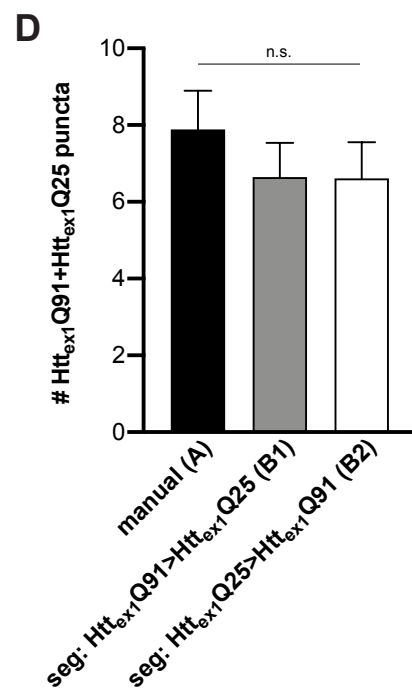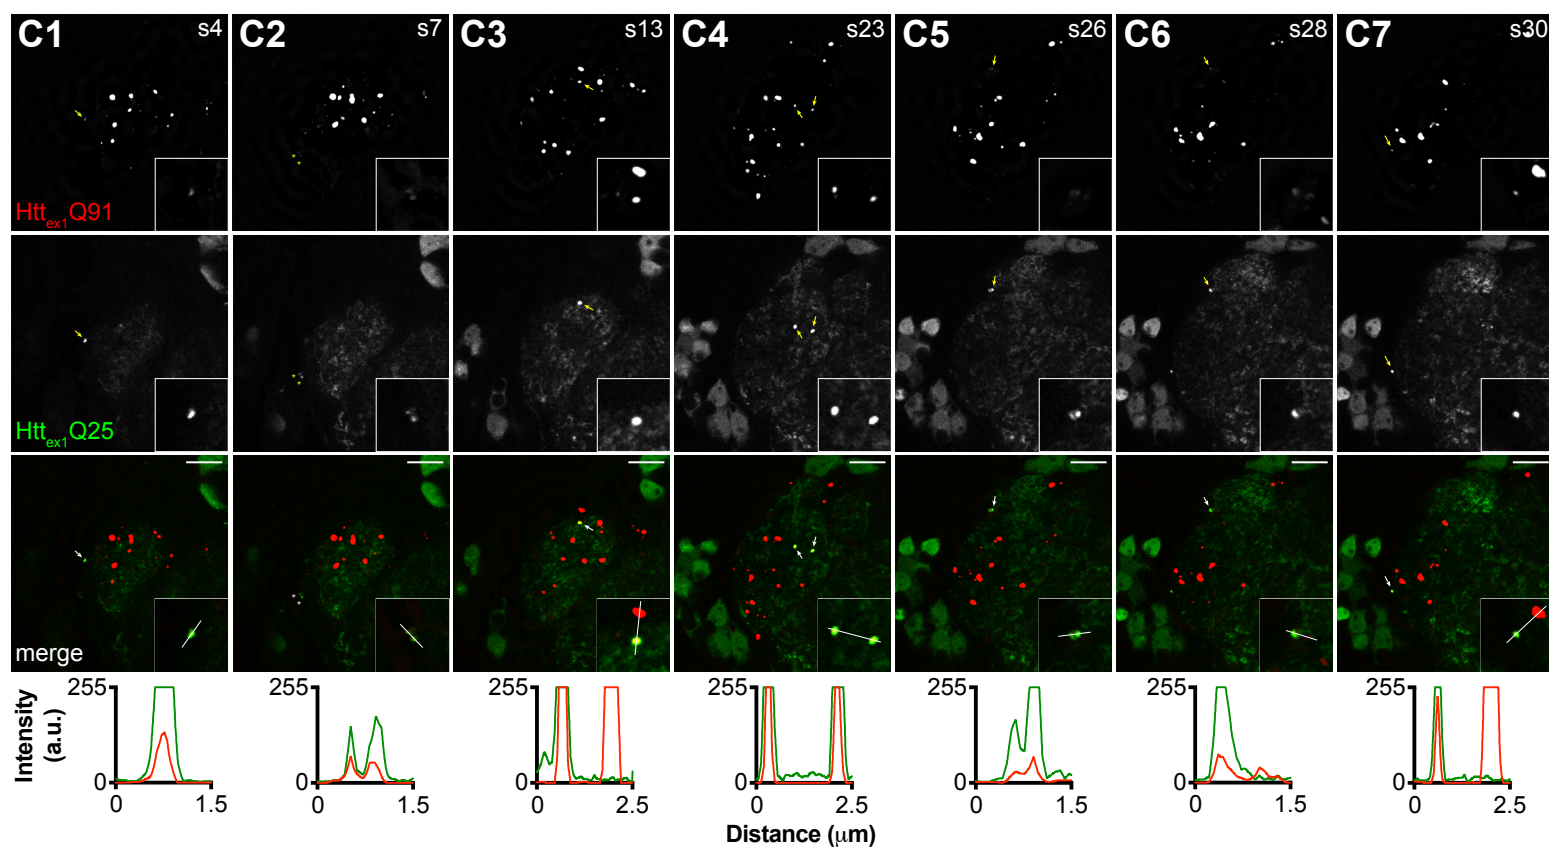

**Figure 1 – figure supplement 2. Semi-automatic quantification of seeded wtHtt<sub>ex1</sub> aggregates.** (A and B) Semi-automatic image processing workflow for high-magnification confocal z-stacks of DA1 glomeruli from 14 day-old adult males expressing Htt<sub>ex1</sub>Q91-mCherry in DA1 ORNs and either (A1,2) Htt<sub>ex1</sub>Q25-GFP or (B1,2) mCD8-GFP in GH146+ PNs. Raw data were preprocessed by deconvolution to reduce noise (*top panels*), segmented in the mCherry (A1 and B1) or GFP (A2 and B2) channels (*middle panels*), and filtered for co-localizing fluorescence signal in the other channel (*bottom panels*). Arrows in (A1 and A2) indicate seven Htt<sub>ex1</sub>Q91+Htt<sub>ex1</sub>Q25 puncta identified by this method. Scale bars = 10  $\mu\text{m}$ . (C1-7) Selected single 0.35  $\mu\text{m}$  confocal z-slices from the same confocal stack shown in (A1 and A2). Slice number is indicated at the top right of each image. Individual Htt<sub>ex1</sub>Q91+Htt<sub>ex1</sub>Q25 puncta identified by semi-automated image segmentation in (A) are indicated with arrows (yellow in individual channels, white on merged images) in each slice. Two additional co-localized Htt<sub>ex1</sub>Q91+Htt<sub>ex1</sub>Q25 puncta identified by manual counting are indicated with asterisks in (A2). Scale bars = 10  $\mu\text{m}$ . Insets show Htt<sub>ex1</sub>Q91+Htt<sub>ex1</sub>Q25 puncta at higher zoom (inset dimensions = 9.12  $\mu\text{m}$  x 9.12  $\mu\text{m}$ ). Htt<sub>ex1</sub>Q91-mCherry (*red*) and Htt<sub>ex1</sub>Q25-GFP (*green*) fluorescence intensity profiles for lines indicated in merged insets are shown below images. Lines were scanned from leftmost to rightmost point. (D) Comparison of manual quantification (C) vs semi-automated segmentation approaches (A1 and A2) for 14 day-old males with the same genotype in (A and C). Data are shown as mean  $\pm$  SEM; n.s. = not significant by one-way ANOVA followed by Tukey's multiple comparisons test.
