# Supplementary material for: Phagocytic glia are obligatory intermediates in transmission of mutant huntingtin aggregates across neuronal synapses
Source: eLife journal article supplement (doi:10.7554/elife.58499), 2020-05-28
Supplement: supp [file elife-58499-supp-v1.zip]

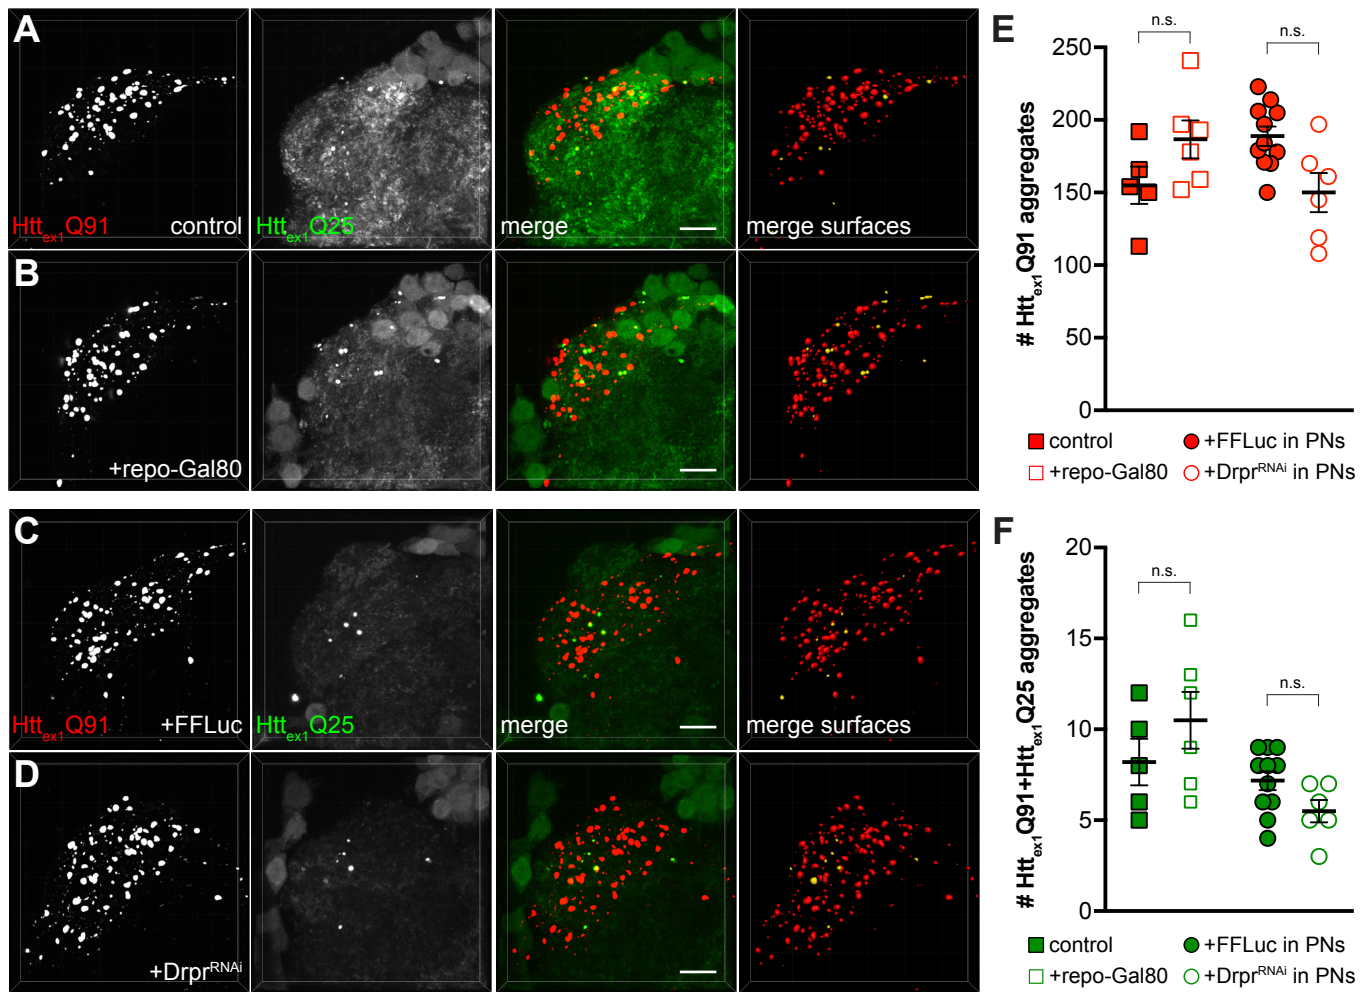

**Figure 5 – figure supplement 2. Gal80-mediated repression of Gal4 in glia or RNAi knockdown of *drpr* in PNs do not alter ORN-to-PN prion-like transfer of mHtt<sub>ex1</sub> aggregates.** (A and B) Confocal z-stacks of DA1 glomeruli from 10-14 day-old adult males expressing *Htt<sub>ex1</sub>Q91*-mCherry in DA1 ORNs and *Htt<sub>ex1</sub>Q25*-GFP in GH146+ PNs with (A) no additional transgenes (“control”) or (B) *repo-Gal80* to inhibit *Gal4*-mediated expression of *Htt<sub>ex1</sub>Q25*-GFP in glia. (C and D) Confocal z-stacks of DA1 glomeruli from 14 day-old adult males expressing *Htt<sub>ex1</sub>Q91*-mCherry in DA1 ORNs and co-expressing *Htt<sub>ex1</sub>Q25*-GFP together with firefly luciferase (FFLuc; C) or dsRNA targeting *draper* (*Drpr<sup>RNAi</sup>*; D) in GH146+ PNs. In (A-D), mCherry+ surfaces identified by semi-automated image segmentation are shown in the last panels, with *Htt<sub>ex1</sub>Q91*-only surfaces in red and *Htt<sub>ex1</sub>Q91*+*Htt<sub>ex1</sub>Q25* surfaces in yellow. Scale bars = 10  $\mu$ m. (E and F) Quantification of *Htt<sub>ex1</sub>Q91* (E) and *Htt<sub>ex1</sub>Q91*+*Htt<sub>ex1</sub>Q25* (F) aggregates for genotypes shown in (A-D). Data are shown as mean  $\pm$  SEM; n.s. = not significant by one-way ANOVA with Tukey's multiple comparisons tests.
