# Supplementary figures and images for: Phagocytic glia are obligatory intermediates in transmission of mutant huntingtin aggregates across neuronal synapses
Source: eLife journal article supplement (doi:10.7554/elife.58499), 2020-05-28

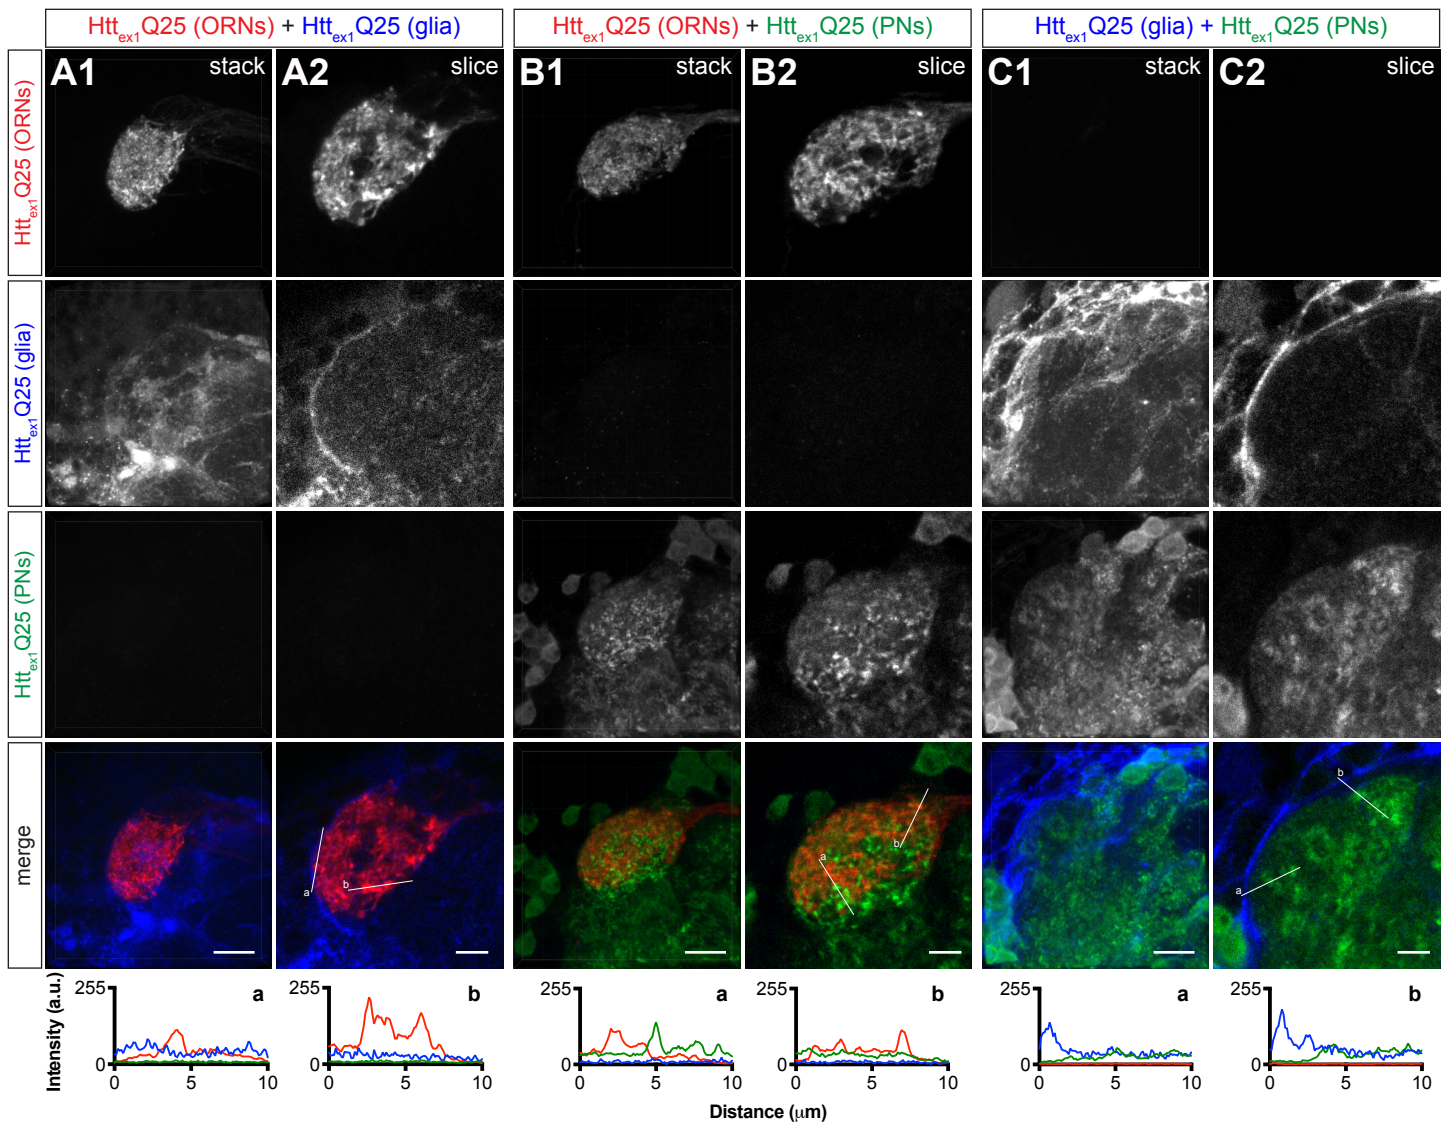

Supplement: supp [file elife-58499-supp-v1.zip]
